# Supplementary material for: Cupping Therapy for Migraine: A PRISMA-Compliant Systematic Review and Meta-Analysis of Randomized Controlled Trials
Source: PubMed Central journal article supplement (PMC8016589; doi:10.1155/2021/7582581), 2021-03-24
Supplement: 7582581.f1.pdf [file 7582581.f1.pdf]

Supplementary 1. Search strategies

| Database | Search terms                                                                                                                                                                                                                                                                                                                                                                                                                                                                                                                                                                                                                                                                                                                                                                                                                                                                                                                                                                                                |
|----------|-------------------------------------------------------------------------------------------------------------------------------------------------------------------------------------------------------------------------------------------------------------------------------------------------------------------------------------------------------------------------------------------------------------------------------------------------------------------------------------------------------------------------------------------------------------------------------------------------------------------------------------------------------------------------------------------------------------------------------------------------------------------------------------------------------------------------------------------------------------------------------------------------------------------------------------------------------------------------------------------------------------|
| MEDLINE  | <ol style="list-style-type: none"> <li>1. "Migraine Disorders"[Mesh]</li> <li>2. "migraine disorders"[Title/Abstract]</li> <li>3. "migraine attack"[Title/Abstract]</li> <li>4. "episodic migraine"</li> <li>5. headache[Title/Abstract]</li> <li>6. (headache\$[Title/Abstract] OR migrain\$[Title/Abstract] OR cephalgi\$[Title/Abstract] OR cephalalgi\$[Title/Abstract])</li> <li>7. (#1 OR #2 OR #3 OR #4 OR #5 OR #6)</li> <li>8. Bloodletting[MeSH Terms]</li> <li>9. "bloodletting therapy"[Title/Abstract]</li> <li>10. cupping[Title/Abstract]</li> <li>11. "wet cupping"[Title/Abstract]</li> <li>12. "Blood-letting cupping"[Title/Abstract]</li> <li>13. "venesection"[Title/Abstract]</li> <li>14. phlebotomy[Title/Abstract]</li> <li>15. "pricking therapy"??Title/Abstract]</li> <li>16. "pricking blood" [Title/Abstract]</li> <li>17. "blood-draining" [Title/Abstract]</li> <li>18. #8 OR #9 OR #10 OR #11 OR #12 OR #13 OR #14 OR #15 OR #16 OR #17</li> <li>19. #7 AND #18</li> </ol> |
| EMBASE   | <ol style="list-style-type: none"> <li>#1 'headache'/exp OR 'headache' OR 'migraine'/exp OR 'migraine' OR 'headache':ab,ti OR 'migraine':ab,ti OR headache*:ab,ti OR migrain*:ab,ti OR cephalgi*:ab,ti OR cephalalgi*:ab,ti OR 'migraine attack':ab,ti OR 'episodic migraine':ab,ti</li> <li>#2 'venesection'/exp OR 'venesection' OR 'cupping'/exp OR 'cupping' OR 'cupping therapy'/exp OR 'cupping therapy' OR 'bloodletting therapy' OR 'bloodletting'/exp OR 'bloodletting'</li> <li>#3 #1 AND #2</li> <li>#4 #1 AND #2 AND [randomized controlled trial]/lim AND [humans]/lim</li> </ol>                                                                                                                                                                                                                                                                                                                                                                                                              |
| CENTRAL  | <ol style="list-style-type: none"> <li>#1 MeSH descriptor: [Migraine Disorders] explode all trees</li> <li>#2 MeSH descriptor: [Headache] explode all trees</li> <li>#3 (headache* or migrain* or cephalgi* or cephalalgi*):ti,ab,kw (Word variations have been searched)</li> <li>#4 "migraine attack"</li> <li>#5 "episodic migraine"</li> <li>#6 #1 or #2 or #3 or #4 or #5</li> <li>#7 MeSH descriptor: [Bloodletting] explode all trees</li> <li>#8 ("bloodletting therapy"):ti,ab,kw (Word variations have been searched)</li> <li>#9 (cupping):ti,ab,kw (Word variations have been searched)</li> <li>#10 ("blood-letting cupping"):ti,ab,kw (Word variations have been searched)</li> <li>#11 (venesection):ti,ab,kw (Word variations have been searched)</li> <li>#12 #7 or #8 or #9 or #10 or #11</li> <li>#13 #6 and #12</li> </ol>                                                                                                                                                              |
| CNKI     | <ol style="list-style-type: none"> <li>1. 偏头痛 OR 发作性偏头痛 OR 偏头痛急性发作 OR 头静脉 OR Migraine</li> <li>2. 拔罐 OR 火罐 OR 走罐 OR Cupping</li> <li>3. #1 AND #2 ('结果中检索' was used)</li> </ol>                                                                                                                                                                                                                                                                                                                                                                                                                                                                                                                                                                                                                                                                                                                                                                                                                             |

CENTRAL = Cochrane Central Register of Controlled Trials, CNKI = China National Knowledge Infrastructure.
